# Supplementary material for: A high efficiency ruthenium(ii) tris-heteroleptic dye containing 4,7-dicarbazole-1,10-phenanthroline for nanocrystalline solar cells
Source: Royal Society of Chemistry journal article supplement (doi:10.1039/c6ra08666g), 2016-01-01
Supplement: c6ra08666g1.pdf [file c6ra08666g1.pdf]

SUPPORTING INFORMATION

**High efficiency ruthenium(II) *tris*-heteroleptic dye containing 4,7-dicarbazole-1,10-phenanthroline for nanocrystalline solar cells**

Andressa V. Müller<sup>†</sup>, Luiz D. Ramos<sup>†</sup>, Karina P. M. Frin<sup>†</sup>, Kleber T. de Oliveira<sup>‡</sup>, André S. Polo<sup>\*†</sup>

<sup>†</sup>Centro de Ciências Naturais e Humanas, Universidade Federal do ABC - UFABC, Av dos Estados, 5001, 09210-580, Santo André - SP, Brazil

<sup>‡</sup>Departamento de Química, Universidade Federal de São Carlos – UFSCAR, Rodovia Washington Luis, km 235, 13565-905, São Carlos – SP, Brazil

\*andre.polo@ufabc.edu.br

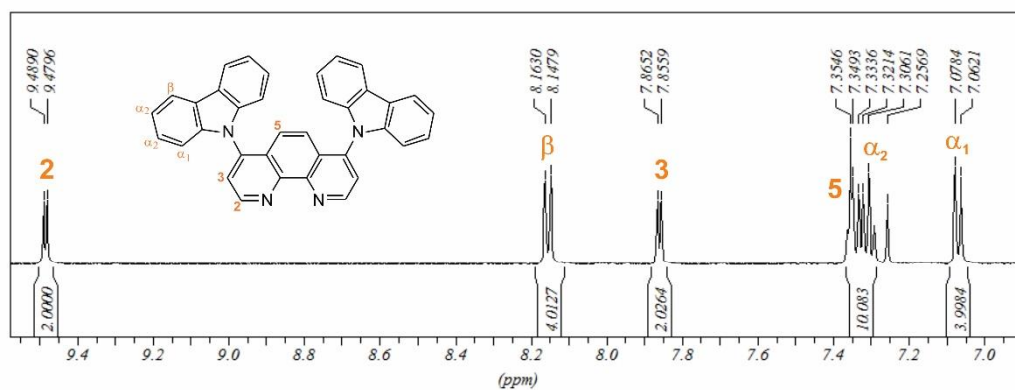

**Figure S1.**  $^1\text{H}$  NMR spectrum of the  $\text{cbz}_2\text{-phen}$  ligand ( $\text{CDCl}_3/500\text{ MHz}$ , 298 K).

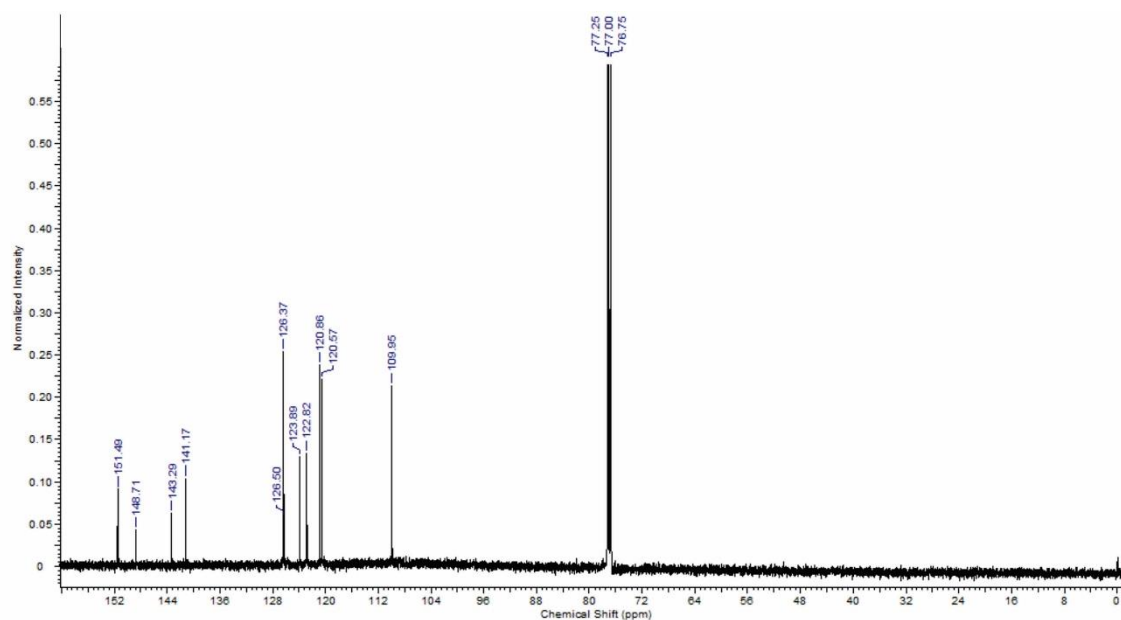

**Figure S2.**  $^{13}\text{C}\{^1\text{H}\}$  NMR spectrum of the  $\text{cbz}_2\text{-phen}$  ligand ( $\text{CDCl}_3/125\text{ MHz}$ , 298 K).

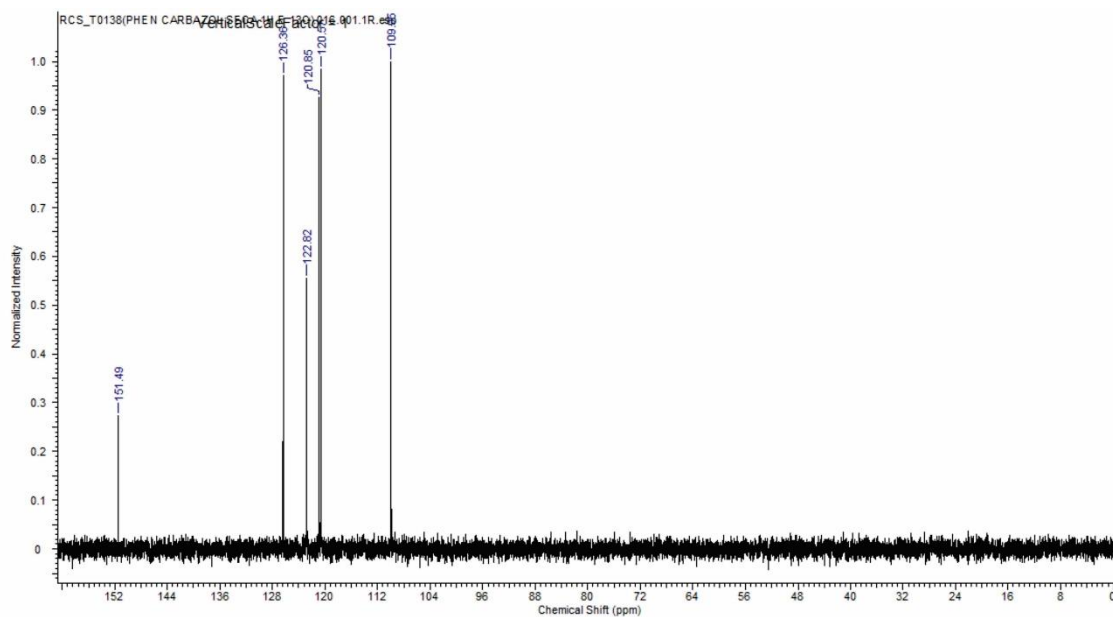

**Figure S3.** DEPT-135  $^{13}\text{C}$  NMR spectrum of the  $\text{cbz}_2\text{-phen}$  ligand ( $\text{CDCl}_3/125\text{ MHz}$ , 298 K).

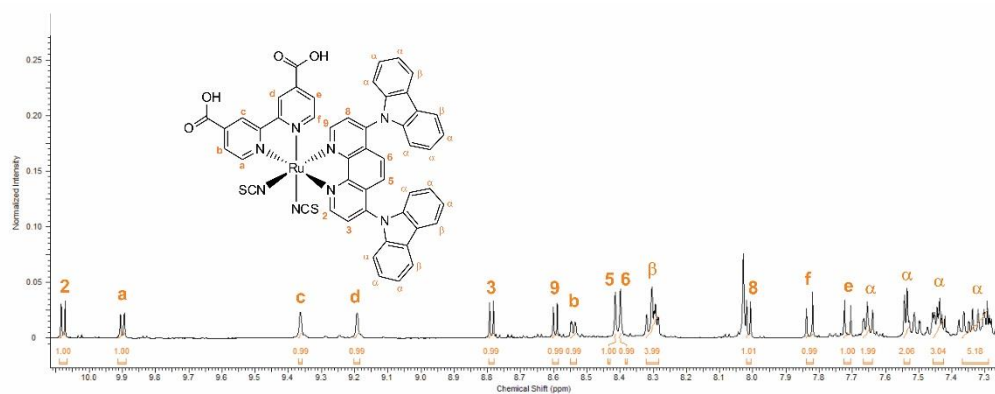

**Figure S4.**  $^1\text{H}$  NMR spectrum of  $\text{cis-}[\text{Ru}(\text{cbz}_2\text{-phen})(\text{dcbH}_2)(\text{NCS})_2]$  ( $\text{DMF-d}_7/500\text{ MHz}$ , 298 K).

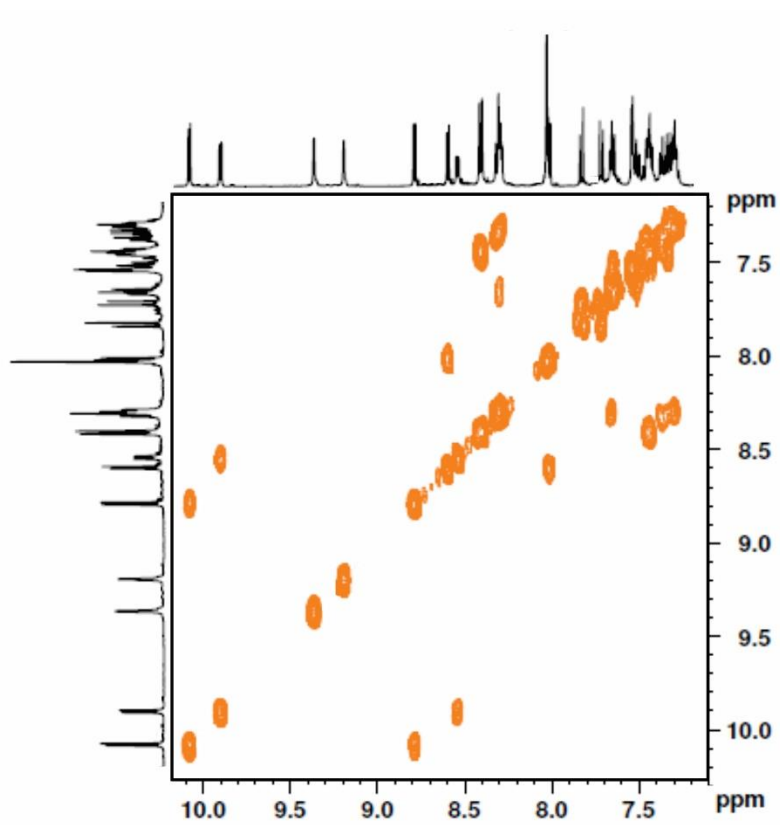

**Figure S5.**  $^1\text{H}$ - $^1\text{H}$  COSY spectrum of *cis*-[Ru(cbz<sub>2</sub>-phen)(dcbH<sub>2</sub>)(NCS)<sub>2</sub>] (DMF-d<sub>7</sub>/500 MHz, 298 K).

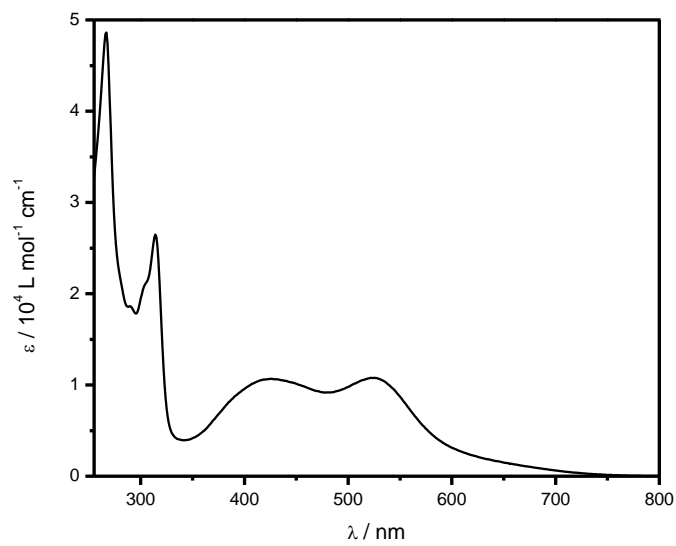

**Figure S6.** Absorption spectrum of *cis*-[Ru(phen)(dcbH<sub>2</sub>)(NCS)<sub>2</sub>] in ethanol.

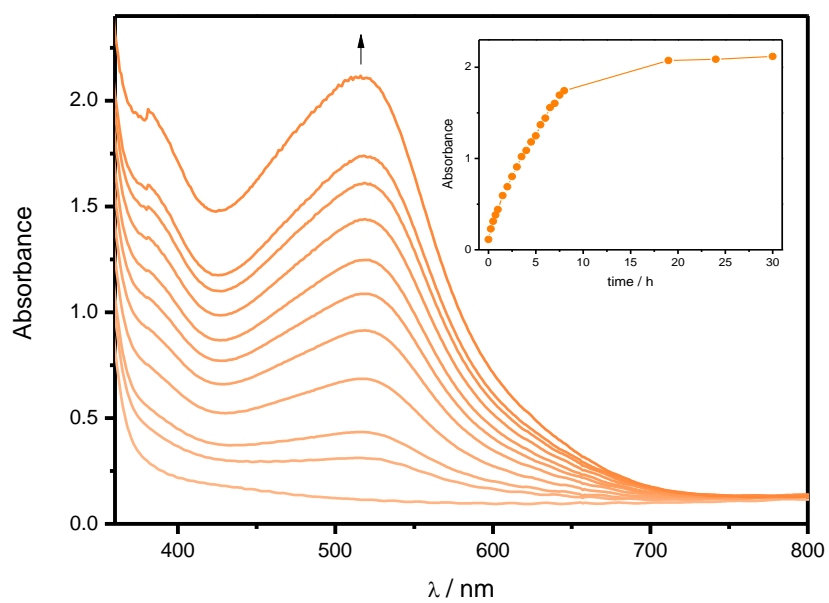

**Figure S7.** Absorption spectra of the TiO<sub>2</sub> film during sensitizing by *cis*-[Ru(cbz<sub>2</sub>-phen)(dcbH<sub>2</sub>)(NCS)<sub>2</sub>]. (Inset: absorption changes at 520 nm as a function of time).
